# Supplementary material
Source: Springer Nature journal article supplement (https://www.springermedizin.de/resource/supplementary/12889_2009_2044_MOESM1_ESM.pdf/9484418)

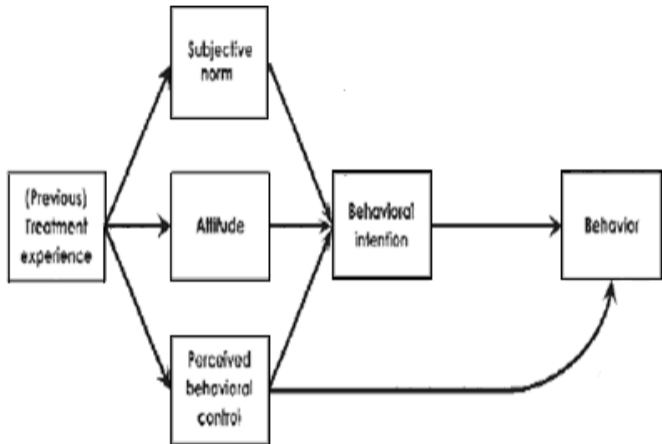

Supplement: MOESM1 [file 9484418]
